# Supplementary material for: On the robustness of generalization of drug–drug interaction models
Source: PubMed Central journal article supplement (PMC8489092; doi:10.1186/s12859-021-04398-9), 2021-10-04
Supplement: 12859_2021_4398_MOESM1_ESM.pdf [file 12859_2021_4398_MOESM1_ESM.pdf]

## Multitask learning and SMILES data augmentation results for 1D-CNN and GIN for each evaluation scheme

Table 1: SMILES Data Augmentation on 1D-CNN. We test here different values of  $n$ , and reported the gap between our evaluation scheme for each  $n$ . Best  $n = 20$  for Twosides and  $n = 80$  for DrugBank. The three rows of the table with the labels graph, fp (fingerprints), and canonical smiles are the benchmarks we compare ourselves to.  $\mu1$  = random -one unseen,  $\mu2$  = random -both unseen,  $\mu3$ = one-unseen - both-unseen

| Dataset  | $\mu1$       | $\mu2$       | $\mu3$       | drug encoding       | $n$       |
|----------|--------------|--------------|--------------|---------------------|-----------|
| DrugBank | 0,274        | 0,506        | 0,232        | fingerprint         | -         |
|          | 0,272        | 0,424.       | <b>0,152</b> | <b>graph</b>        | -         |
|          | 0,319        | 0,608        | 0,289        | canonical, SMILES   | -         |
|          | 0,292        | 0,538        | 0,245        | Rand, SMILES        | 10        |
|          | 0,271        | 0,504        | 0,232        | Rand, SMILES        | 20        |
|          | 0,245        | 0,452        | 0,207        | Rand, SMILES        | 40        |
|          | <b>0,227</b> | <b>0,416</b> | <b>0,189</b> | <b>Rand, SMILES</b> | <b>80</b> |
|          | 0,258        | 0,428        | 0,170        | Rand, SMILES        | 100       |
| twosides | 0,042        | 0,069        | 0,028        | fingerprint         | -         |
|          | 0,032        | 0,052        | 0,020        | graph               |           |
|          | 0,155        | 0,200        | 0,045        | canonical, SMILES   | -0        |
|          | 0,080        | 0,110        | 0,029        | Rand, SMILES        | 10        |
|          | <b>0,039</b> | <b>0,068</b> | <b>0,029</b> | <b>Rand, SMILES</b> | <b>20</b> |
|          | 0,092        | 0,127        | 0,034        | Rand, SMILES        | 40        |
|          | 0,055        | 0,082        | 0,028        | Rand, SMILES        | 80        |
|          | 0,095        | 0,116        | 0,021        | Rand, SMILES        | 100       |

Table 2: SMILES data augmentation on GIN. GIN model was trained using firstly only canonical SMILES, and finally, with randomized SMILES. For each molecule,100 valid randomized SMILES strings were generated.

|    | SMILES     | Evaluation scheme | Model | seed | dataset  | AUROC (micro) | AUPRC (macro) |
|----|------------|-------------------|-------|------|----------|---------------|---------------|
| 0  | Canonical  | One-unseen        | GIN   | 42   | drugbank | 0,969         | 0,477         |
| 1  | Randomized | One-unseen        | GIN   | 42   | drugbank | 0,968         | 0,468         |
| 2  | Canonical  | Both-unseen       | GIN   | 42   | drugbank | 0,951         | 0,324         |
| 3  | Randomized | Both-unseen       | GIN   | 42   | drugbank | 0,946         | 0,309         |
| 4  | Canonical  | One-unseen        | GIN   | 42   | twosides | 0,790         | 0,238         |
| 5  | Randomized | One-unseen        | GIN   | 42   | twosides | 0,787         | 0,236         |
| 6  | Canonical  | Both-unseen       | GIN   | 42   | twosides | 0,775         | 0,218         |
| 7  | Randomized | Both-unseen       | GIN   | 42   | twosides | 0,773         | 0,216         |
| 8  | Canonical  | random            | GIN   | 42   | twosides | 0,806         | 0,270         |
| 9  | Randomized | random            | GIN   | 42   | twosides | 0,816         | 0,286         |
| 10 | Canonical  | random            | GIN   | 42   | drugbank | 0,993         | 0,748         |
| 11 | Randomized | random            | GIN   | 42   | drugbank | 0,992         | 0,716         |

Table 3: SMILES data augmentation on 1D-CNN. 1d-CNN model was trained using firstly only canonical SMILES, and finally, with randomized SMILES. For each molecule, 100 valid randomized SMILES strings were generated.

|    | SMILES     | Evaluation scheme | Model | seed | dataset  | AUROC (micro) | AUPRC (macro) |
|----|------------|-------------------|-------|------|----------|---------------|---------------|
| 0  | canonical  | One-unseen        | CNN   | 42   | twosides | 0,800         | 0,248         |
| 1  | Randomized | One-unseen        | CNN   | 42   | twosides | 0,772         | 0,209         |
| 2  | canonical  | Both-unseen       | CNN   | 42   | twosides | 0,753         | 0,203         |
| 3  | Randomized | Both-unseen       | CNN   | 42   | twosides | 0,752         | 0,189         |
| 4  | canonical  | random            | CNN   | 42   | twosides | 0,870         | 0,403         |
| 5  | Randomized | random            | CNN   | 42   | twosides | 0,823         | 0,305         |
| 6  | canonical  | random            | CNN   | 42   | drugbank | 0,999         | 0,957         |
| 7  | Randomized | random            | CNN   | 42   | drugbank | 0,992         | 0,700         |
| 8  | canonical  | One-unseen        | CNN   | 42   | drugbank | 0,981         | 0,634         |
| 9  | Randomized | One-unseen        | CNN   | 42   | drugbank | 0,959         | 0,441         |
| 10 | canonical  | Both-unseen       | CNN   | 42   | drugbank | 0,922         | 0,345         |
| 11 | Randomized | Both-unseen       | CNN   | 42   | drugbank | 0,927         | 0,270         |

Table 4: Multitask learning strategies results. We explore 4 learning strategies to train a joint network for DDIs and CMap scores prediction.

| Learning strategy | dataset  | evaluation scheme | seed | AUROC (macro) | AUPRC (macro) | AUROC (micro) | AUPRC (micro) |
|-------------------|----------|-------------------|------|---------------|---------------|---------------|---------------|
| Single task       | twosides | Random            | 42   | 0.82          | 0.28          | 0.87          | 0.40          |
| C1                | twosides | Random            | 42   | 0.87          | 0.34          | 0.89          | 0.42          |
| C2                | twosides | Random            | 42   | 0.68          | 0.12          | 0.81          | 0.25          |
| T1                | twosides | Random            | 42   | 0.85          | 0.32          | 0.88          | 0.41          |
| T2                | twosides | Random            | 42   | 0.77          | 0.23          | 0.85          | 0.35          |

Table 5: C1 on 1D-CNN. Evaluation scheme = one-unseen

| Model                   | dataset  | Evaluation scheme | seed | AUROC (macro) | AUPRC (macro) | AUROC (micro) | AUPRC (micro) |
|-------------------------|----------|-------------------|------|---------------|---------------|---------------|---------------|
| Single task             | twosides | one-unseen        | 42   | 0.676         | 0.117         | 0.800         | 0.248         |
| C1 No Regularization    | twosides | one-unseen        | 42   | 0.728         | 0.139         | 0.817         | 0.257         |
| C1 dropout = 0.2        | twosides | one-unseen        | 42   | 0.733         | 0.142         | 0.822         | 0.262         |
| C1 dropout = 0.4        | twosides | one-unseen        | 42   | 0.729         | 0.139         | 0.822         | 0.268         |
| C1 dropout = 0.8        | twosides | one-unseen        | 42   | 0.694         | 0.126         | 0.807         | 0.255         |
| C1 weight decay = 1e-05 | twosides | one-unseen        | 42   | 0.734         | 0.146         | 0.817         | 0.260         |
| C1 weight decay = 1e-04 | twosides | one-unseen        | 42   | 0.682         | 0.135         | 0.796         | 0.257         |
| C1 weight decay = 1e-3  | twosides | one-unseen        | 42   | 0.611         | 0.104         | 0.738         | 0.193         |
| C1 weight decay = 1e-02 | twosides | one-unseen        | 42   | 0.572         | 0.089         | 0.63          | 0.099         |

Table 6: C1 on 1D-CNN. Evaluation scheme = both-unseen

| Model                   | dataset  | Evaluation scheme | seed | AUROC (macro) | AUPRC (macro) | AUROC (micro) | AUPRC (micro) |
|-------------------------|----------|-------------------|------|---------------|---------------|---------------|---------------|
| Single task             | twosides | both-unseen       | 42   | 0.582         | 0.102         | 0.753         | 0.203         |
| C1 No Regularization    | twosides | both-unseen       | 42   | 0.545         | 0.095         | 0.754         | 0.200         |
| C1 dropout = 0.2        | twosides | both-unseen       | 42   | 0.562         | 0.103         | 0.770         | 0.215         |
| C1 dropout = 0.4        | twosides | both-unseen       | 42   | 0.560         | 0.099         | 0.773         | 0.215         |
| C1 dropout = 0.8        | twosides | both-unseen       | 42   | 0.569         | 0.101         | 0.776         | 0.226         |
| C1 weight decay = 1e-05 | twosides | both-unseen       | 42   | 0.551         | 0.102         | 0.74          | 0.198         |
| C1 weight decay = 1e-04 | twosides | both-unseen       | 42   | 0.546         | 0.111         | 0.692         | 0.172         |
| C1 weight decay = 1e-3  | twosides | both-unseen       | 42   | 0.533         | 0.098         | 0.64          | 0.108         |
| C1 weight decay = 1e-02 | twosides | both-unseen       | 42   | 0.54          | 0.094         | 0.548         | 0.075         |

Table 7: C1 on GIN. Evaluation scheme = One-unseen &amp; both-unseen

| dataset               | seed | model    | Evaluation scheme | AUROC (micro) | AUPRC (micro) | AUROC (macro) | AUPRC (macro) |
|-----------------------|------|----------|-------------------|---------------|---------------|---------------|---------------|
| twosides              | 42   | GIN      | Both-unseen       | 0.775         | 0.218         | 0.551         | 0.100         |
| twosides + Touchstone | 42   | GIN + C1 | Both-unseen       | 0.785         | 0.23          | 0.58          | 0.105         |
| twosides              | 42   | GIN      | One -unseen       | 0.800         | 0.240         | 0.600         | 0.101         |
| twosides + Touchstone | 42   | GIN + C1 | One-unseen        | 0.794         | 0.245         | 0.629         | 0.108         |

Table 8: Maximum Mean Discrepancy (MMD) between drug features distributions. For each of our evaluation scheme, we estimate the maximum mean discrepancy for drug features distributions between partitions.

| Dataset  | Evaluation scheme | train/valid | train/test | test/valid |
|----------|-------------------|-------------|------------|------------|
| Twosides | Random            | 4e-05       | 7,1e-05    | 6,7e-05    |
|          | One-unseen        | 3,49e-04    | 3,45e-04   | 5,79e-04   |
|          | Both-unseen       | 3,49e-04    | 1,8e-02    | 1,78e-02   |
| DrugBank | Random            | 3,9e-05     | 4,3e-05    | 4e-05      |
|          | One-unseen        | 2,97e-04    | 3,07e-04   | 4,1e-04    |
|          | Both-unseen       | 2,97e-04    | 4,108e-02  | 3,9e-03    |
